# Supplementary material
Source: publisher site journal article supplement (https://www.dovepress.com/article/339046)
Supplement: Supplementary file 1 [file get_supplementary_file.php]

Supplementary material

**Silver nanoparticles as chlorhexidine and metronidazole drug delivery platforms potential use in periodontitis treatment**

Karol P. Steckiewicz1, Piotr, Cieciórski2,Ewelina Barcińska1, Maciej Jaśkiewicz3, Magdalena Narajczyk4, Marta Bauer3, Wojciech Kamysz3, Elżbieta Megiel2, Iwona Inkielewicz – Stepniak1*

1 Department of Pharmaceutical Pathophysiology, Faculty of Pharmacy, Medical University of Gdansk, Gdansk, Poland

2 Faculty of Chemistry, University of Warsaw, Warsaw, Poland

3 Department of Inorganic Chemistry, Faculty of Pharmacy, Medical University of Gdansk, Gdansk, Poland

4 Laboratory of Electron Microscopy, Faculty of Biology, University of Gdansk, Gdansk, Poland

**
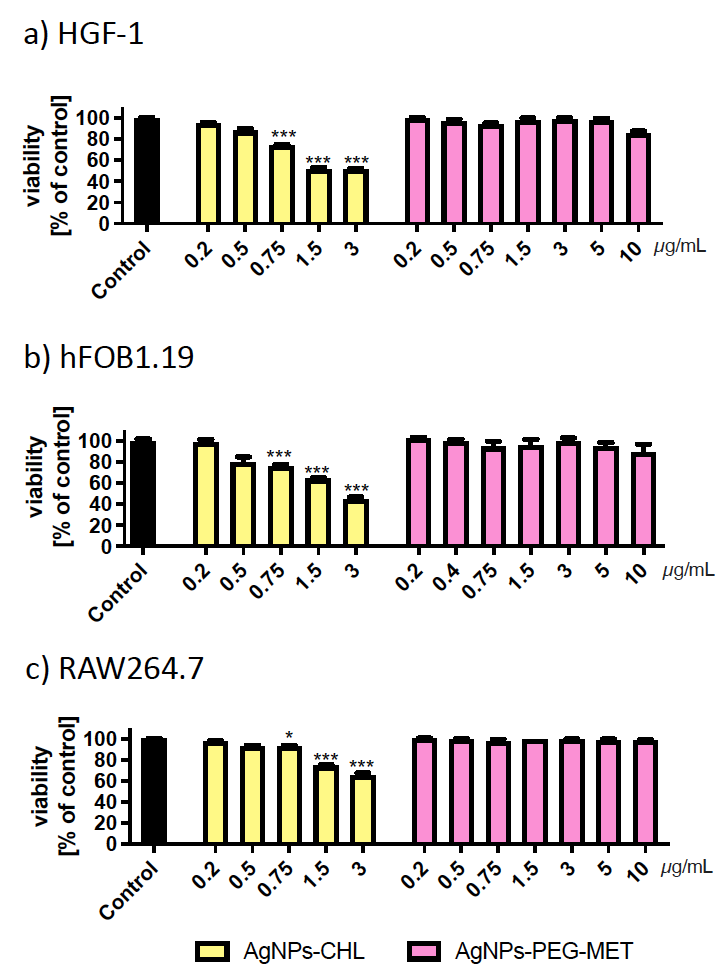
**

**Supplementary figure 1** Effect of AgNPs-CHL and AgNPs-PEG-MET on viability of cells. Viability was measure by MTT assay after 24h of treatment. a) HGF-1 cells, b) hFOB1.19 cells, c) RAW264.7 cells. Data are presented as mean ± SD. * p<0.05, *** p<0.001


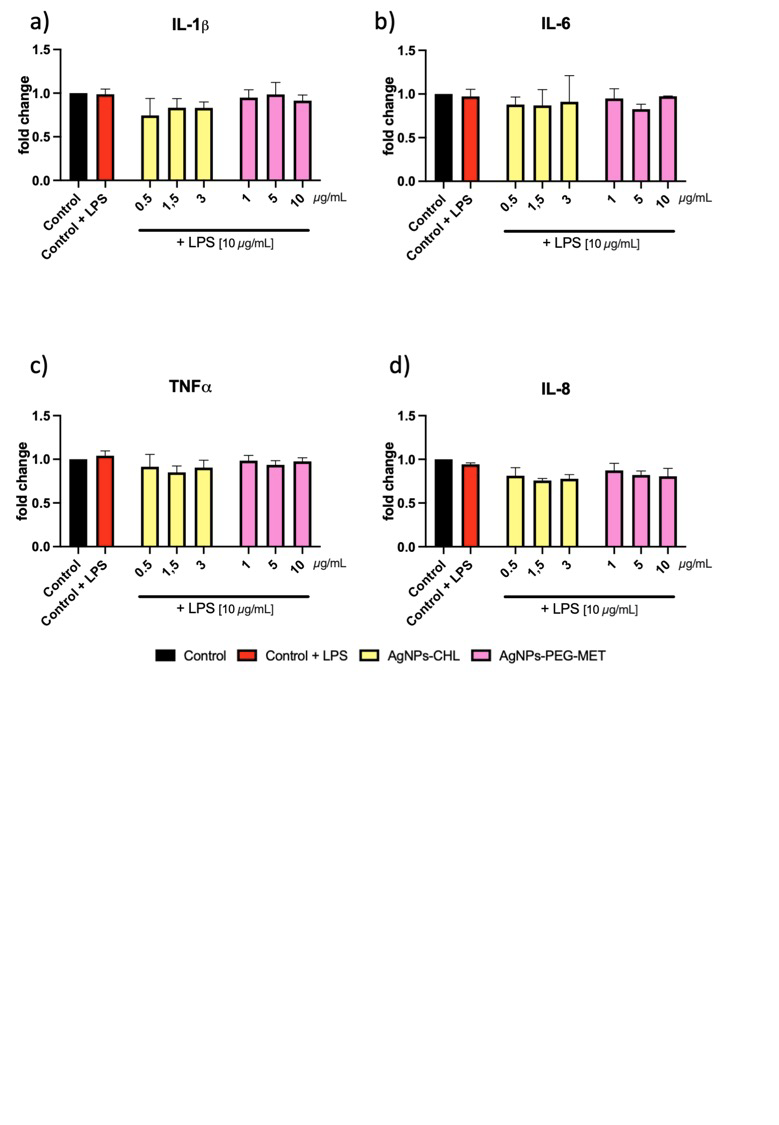


**Supplementary figure 2** Intracellular production of cytokines by HGF-1 cells. Cells were treated with AgNPs for 24h and LPS was used to stimulate inflammation. Production of IL-1ß a), production of IL-6 b), production of TNFα c), production of IL-8 d). Data are presented as mean ± SD.


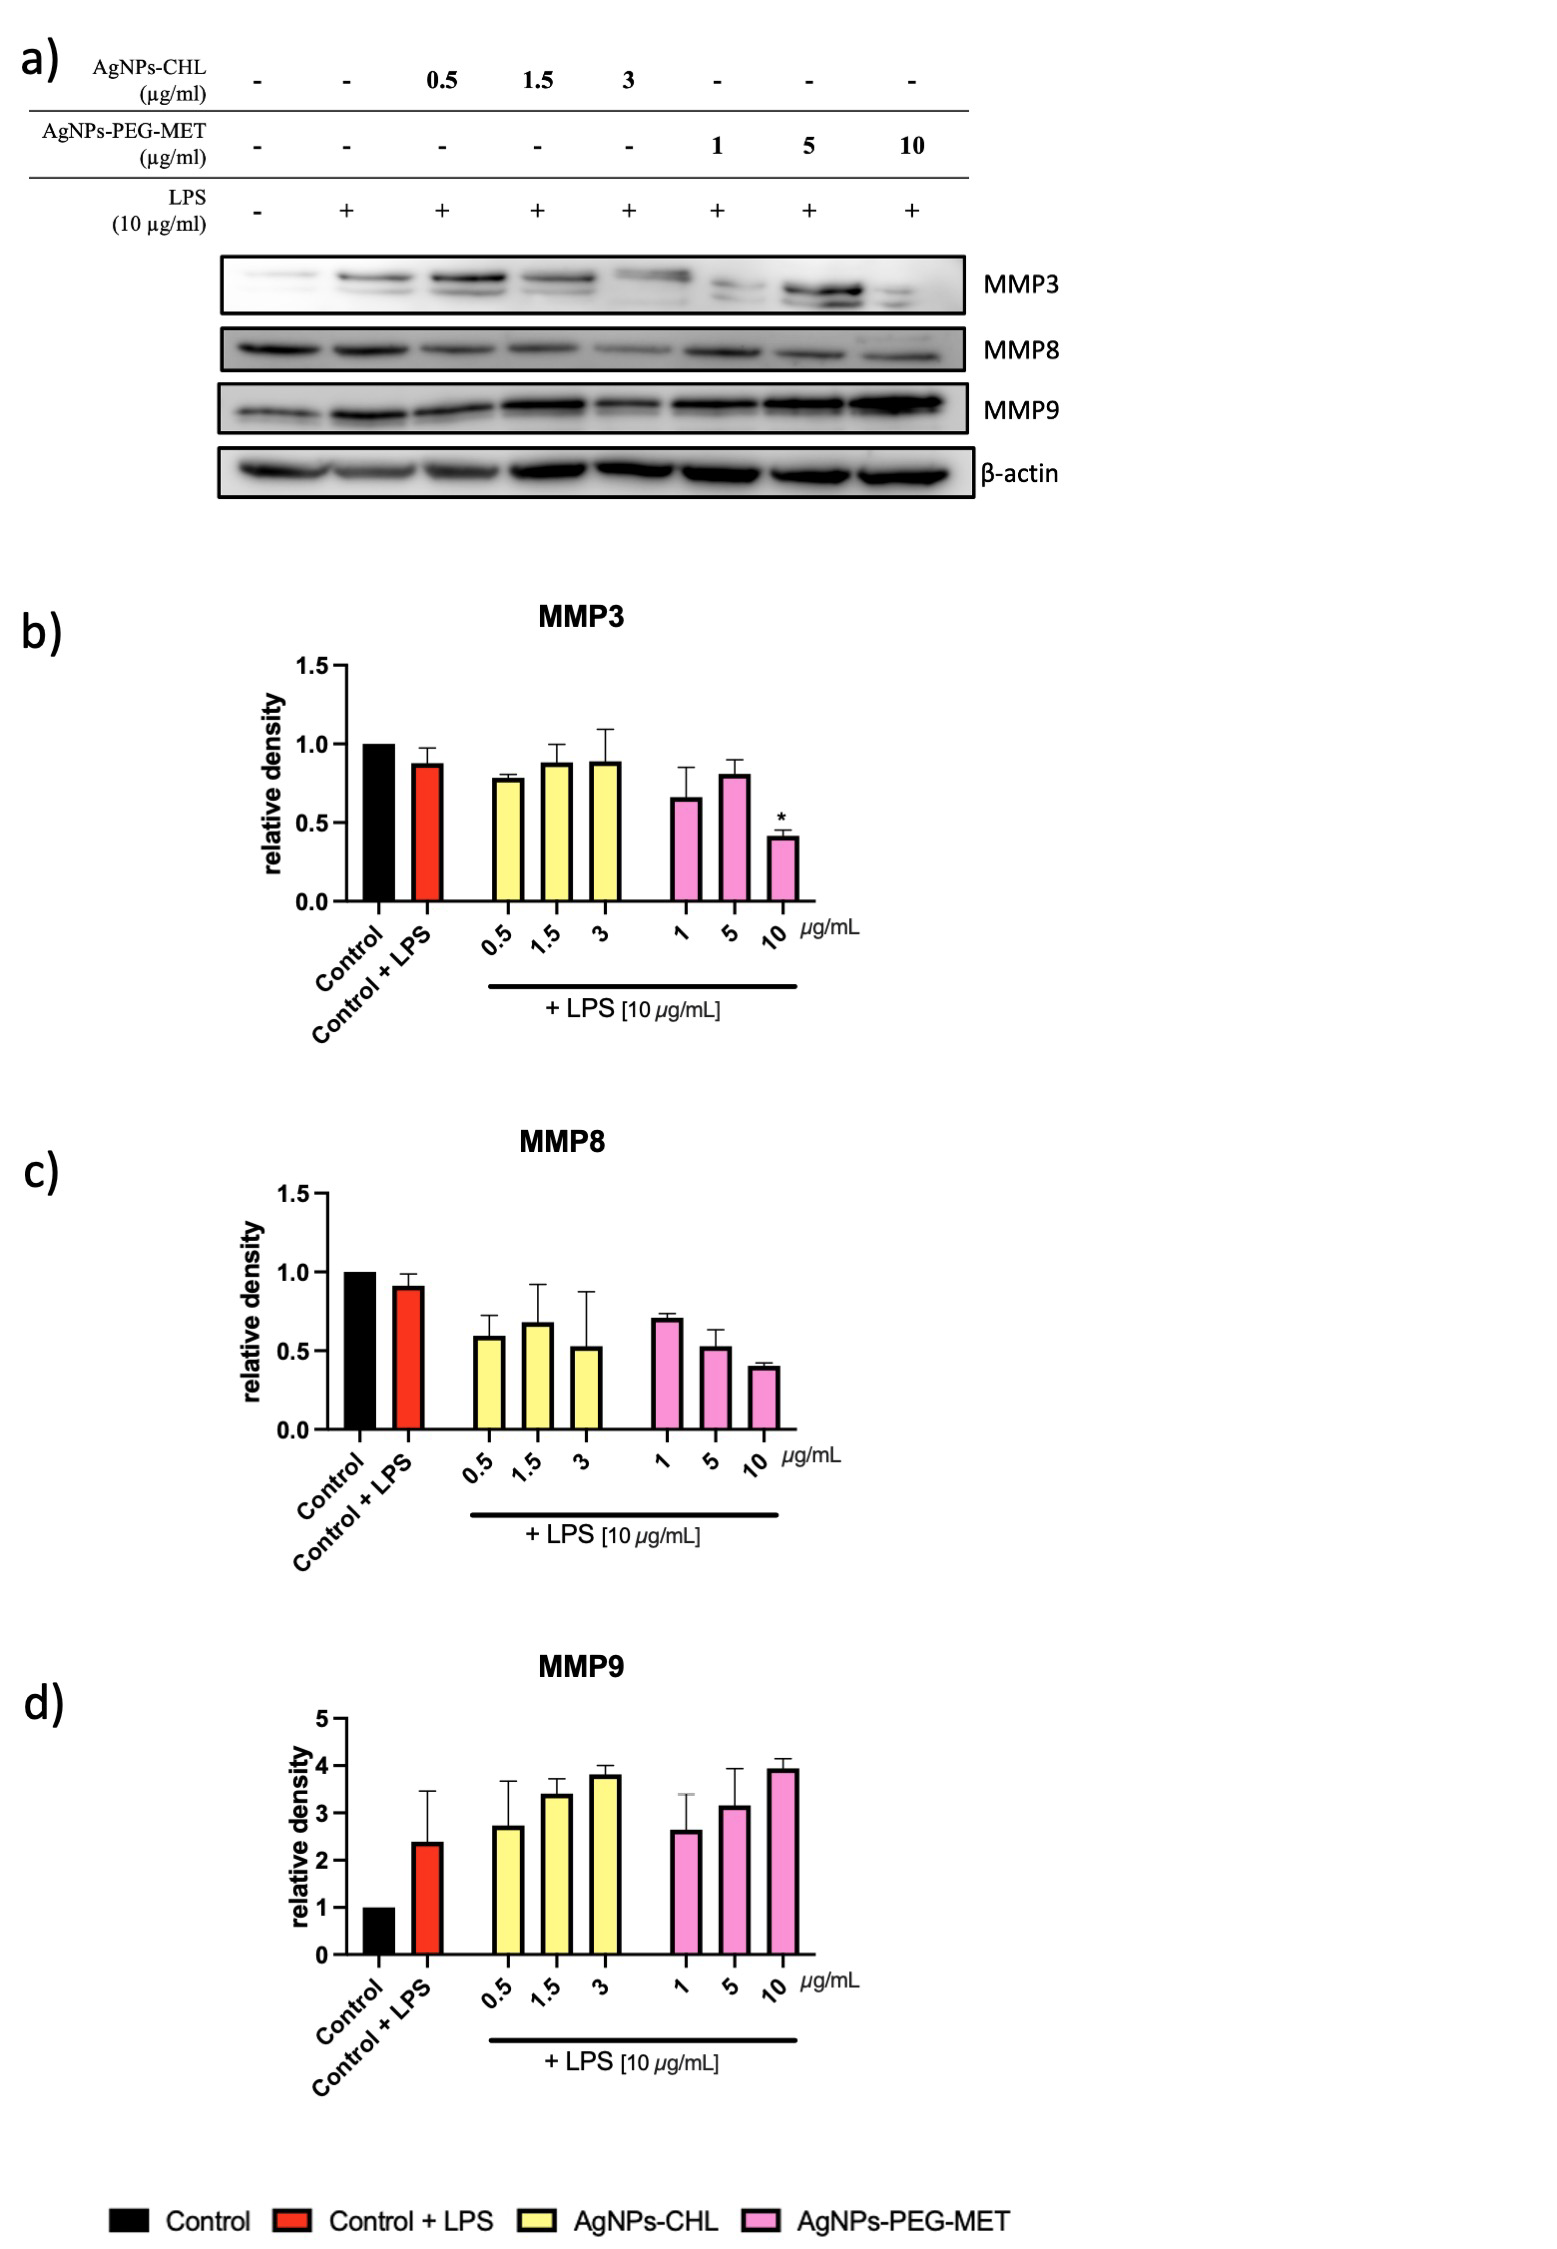


**Supplementary figure 3** Metalloproteinase levels in HGF-1 cells. Cells were treated with AgNPs for 24h and LPS was used to stimulate inflammation representative western blots a), quantification of MMP3 levels b), quantification of MMP8 levels c), quantification of MMP9 levels d). Data are presented as mean ± SD. *p<0.05 (vs control treated with LPS).
